# Supplementary material for: Sequential amine functionalization inducing structural transition in an aldehyde-containing zeolitic imidazolate framework: application to gas separation membranes
Source: Royal Society of Chemistry journal article supplement (doi:10.1039/c7ce00086c), 2017-01-01
Supplement: c7ce00086c1.pdf [file c7ce00086c1.pdf]

# Sequential Amine-Functionalization Inducing Structural Transition in Aldehyde-Containing Zeolitic Imidazolate Framework: Application to Gas Separation Membranes

Fernando Cacho-Bailo,<sup>a</sup> Miren Etxeberria-Benavides,<sup>b</sup> Oğuz Karvan,<sup>b</sup> Carlos Téllez,<sup>a</sup> Joaquín Coronas<sup>a,\*</sup>

<sup>a</sup> Chemical and Environmental Engineering Department and Instituto de Nanociencia de Aragón (INA), Universidad de Zaragoza, 50018 Zaragoza, Spain

<sup>b</sup> Tecnalia Research and Innovation, Energy and Environmental Division, 20009 Donostia-San Sebastián, Spain

## Electronic Supporting Information

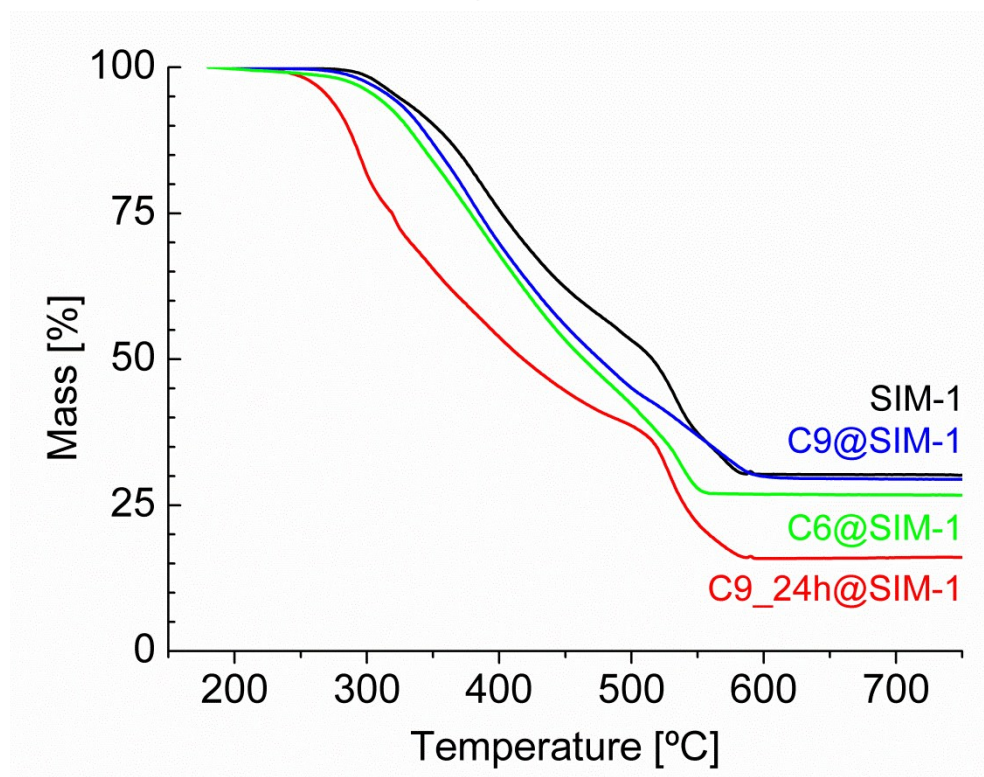

Figure S1. TGA curves in the 100-750 °C range in an air atmosphere. The extent of the imine-condensation functionalization reaction was calculated from the residue weight at 750 °C of each of the powdered samples (see Table 2).

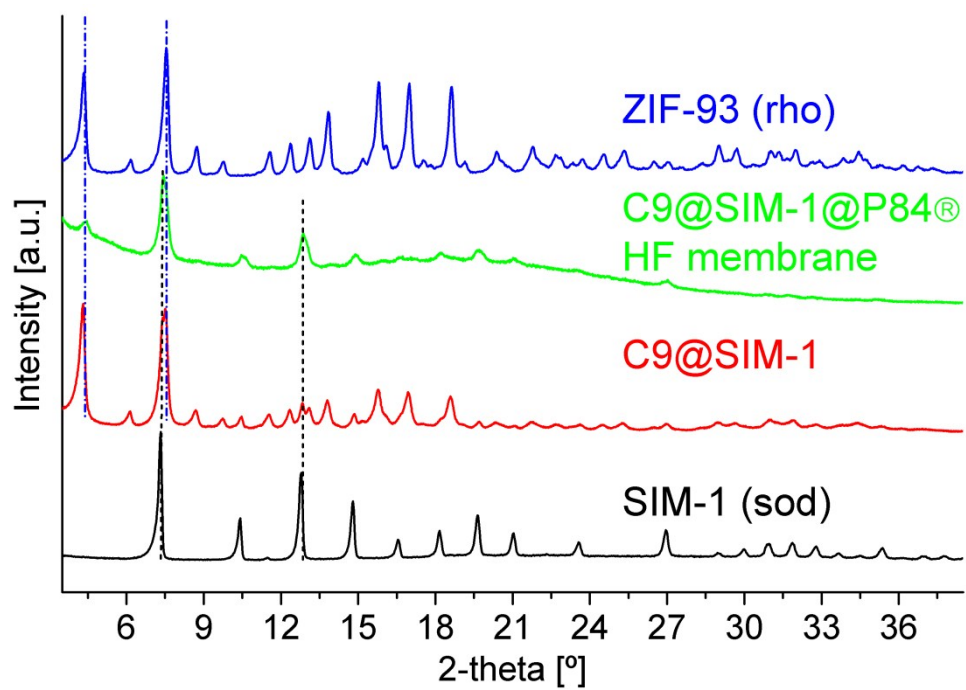

Figure S2. XRD spectra of the C9@SIM-1@P84<sup>®</sup> HF membrane, compared to those of the SIM-1, ZIF-93 and C9@SIM-1@P84<sup>®</sup> powders.

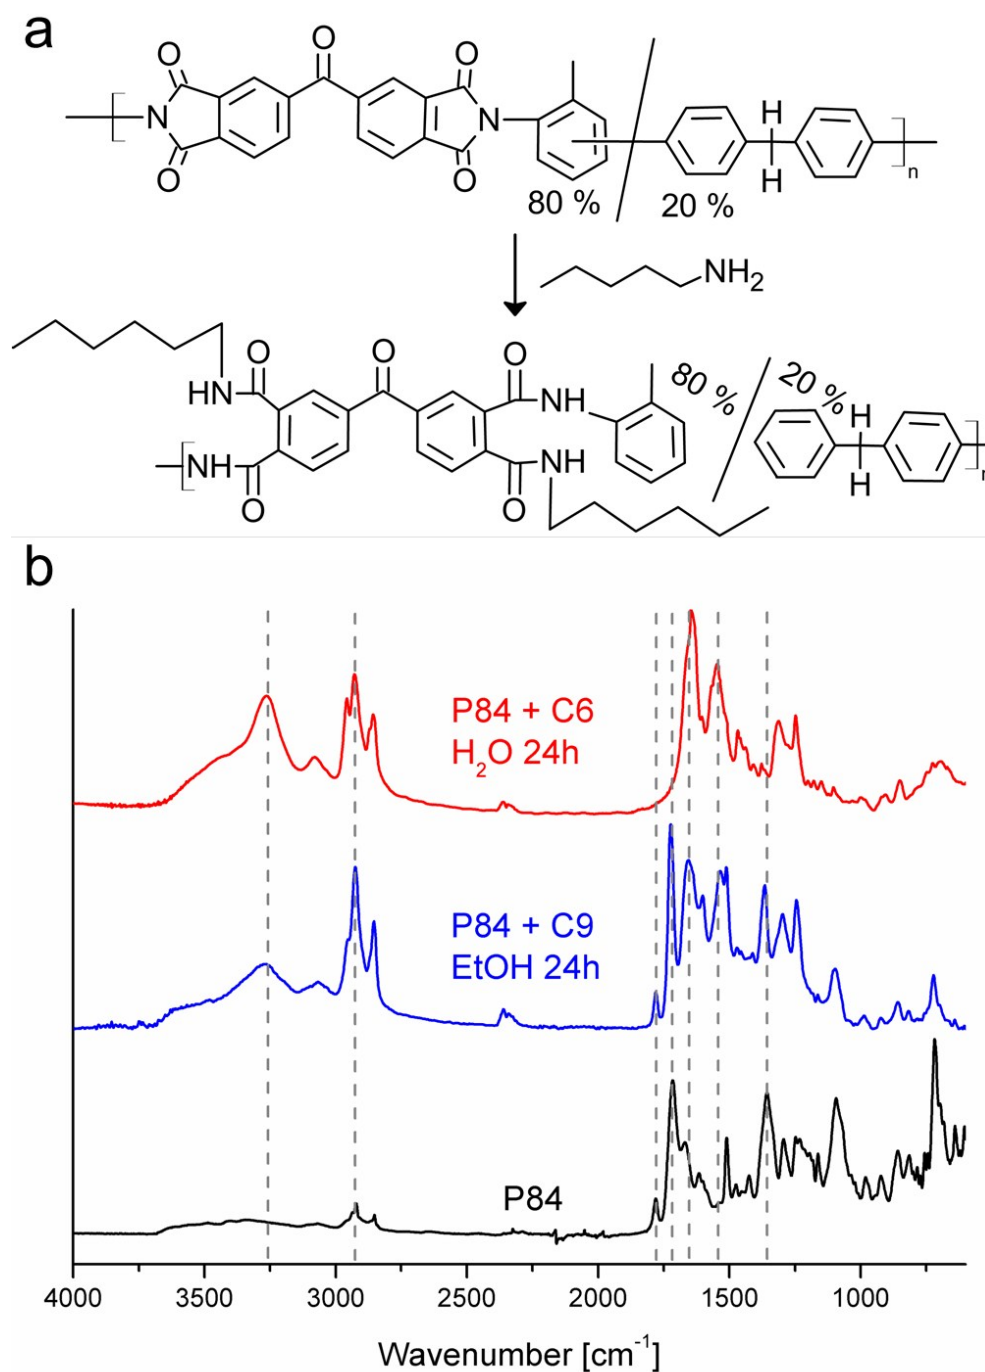

Figure S3. Scheme of the P84<sup>®</sup> polymer reaction with an amine, in this case with hexylamine (a). FTIR spectra of the as-made P84<sup>®</sup> HF and those reacted with hexyl- and nonylamine for 24 h, as a probe. A much higher extent of reaction could be deduced with the water-dissolved C6 than with the ethanol-dissolved C9 (b).
